# Supplementary material for: Sulfonyl-bridged (copper-immobilized nickel ferrite) with activated montmorillonite, [(NiFe2O4@Cu)SO2(MMT)]: a new class of magnetically separable clay nanocomposite systems towards Hantzsch synthesis of coumarin-based 1,4-dihydropyridines
Source: Royal Society of Chemistry journal article supplement (doi:10.1039/c9ra00177h), 2019-01-01

**Sulfonyl-bridged (copper-immobilized nickel ferrite) with activated montmorillonite, [(NiFe<sub>2</sub>O<sub>4</sub>@Cu)SO<sub>2</sub>(MMT)]: a new class of magnetically separable clay nanocomposite systems towards Hantzsch synthesis of coumarin-based 1,4-dihydropyridines**

Behzad Zeynizadeh and Soleiman Rahmani

Faculty of Chemistry, Urmia University, Urmia 5756151818, Iran  
E-mail: s.rahmani@urmia.ac.ir

**<sup>1</sup>H NMR (300 MHz, DMSO-d<sub>6</sub>) of 7-phenyl-7,14-dihydro-6H,8H-dichromeno[4,3-b:3',4'-e]pyridine-6,8-di-one (4a)**

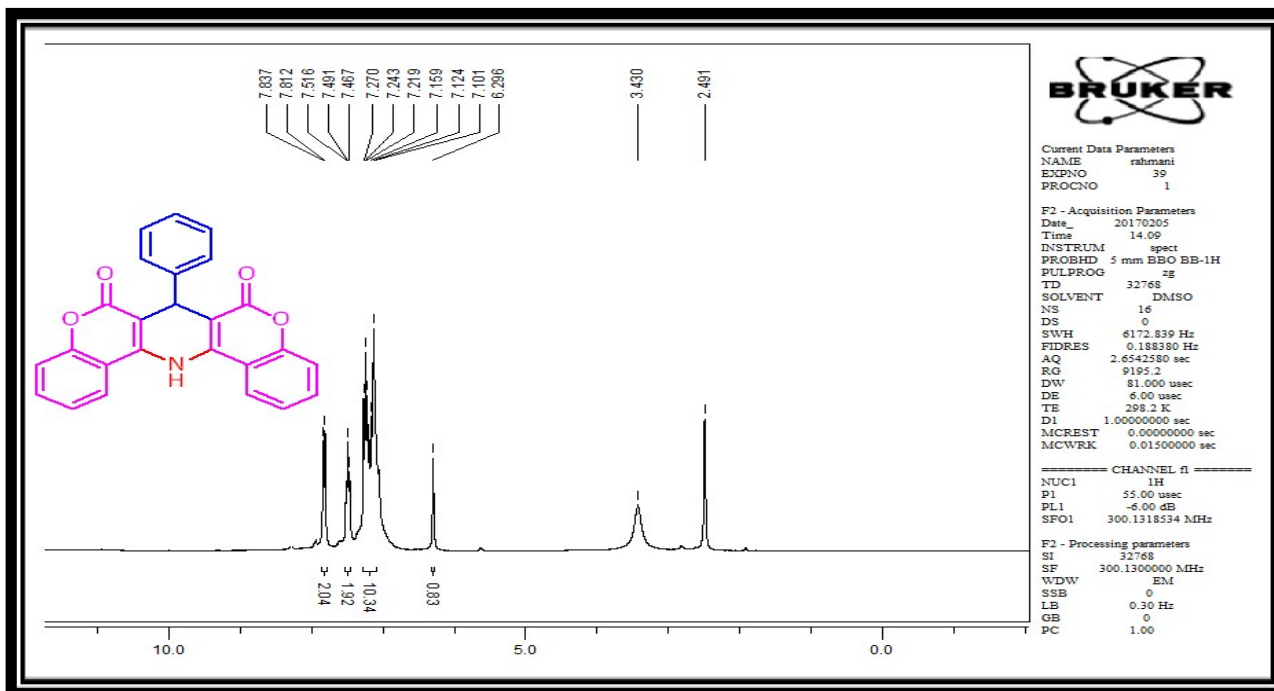

**FT-IR (KBr) of 7-phenyl-7,14-dihydro-6H,8H-dichromeno[4,3-b:3',4'-e]pyridine-6,8-dione (4a)**

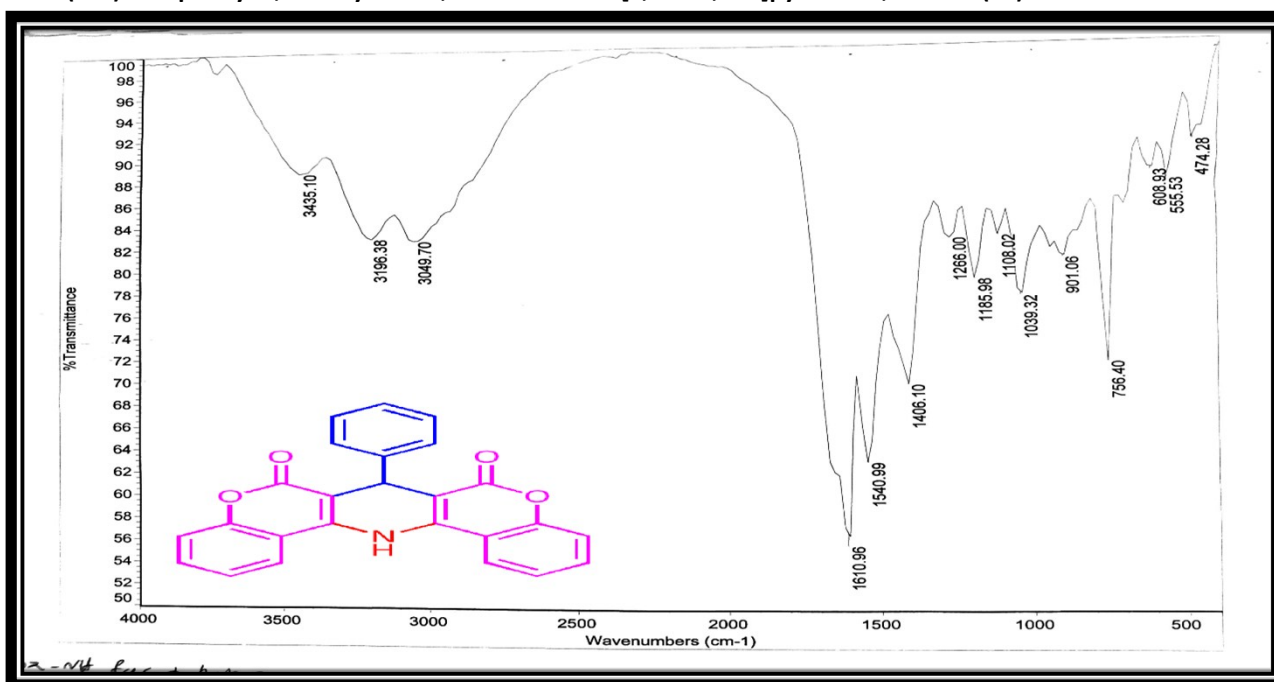

<sup>1</sup>H NMR (300 MHz, DMSO-d<sub>6</sub>) of 7-(2-chlorophenyl)-7,14-dihydro-6H,8H-dichromeno[4,3-b:3',4'-e]pyridine-6,8-dione (4b)

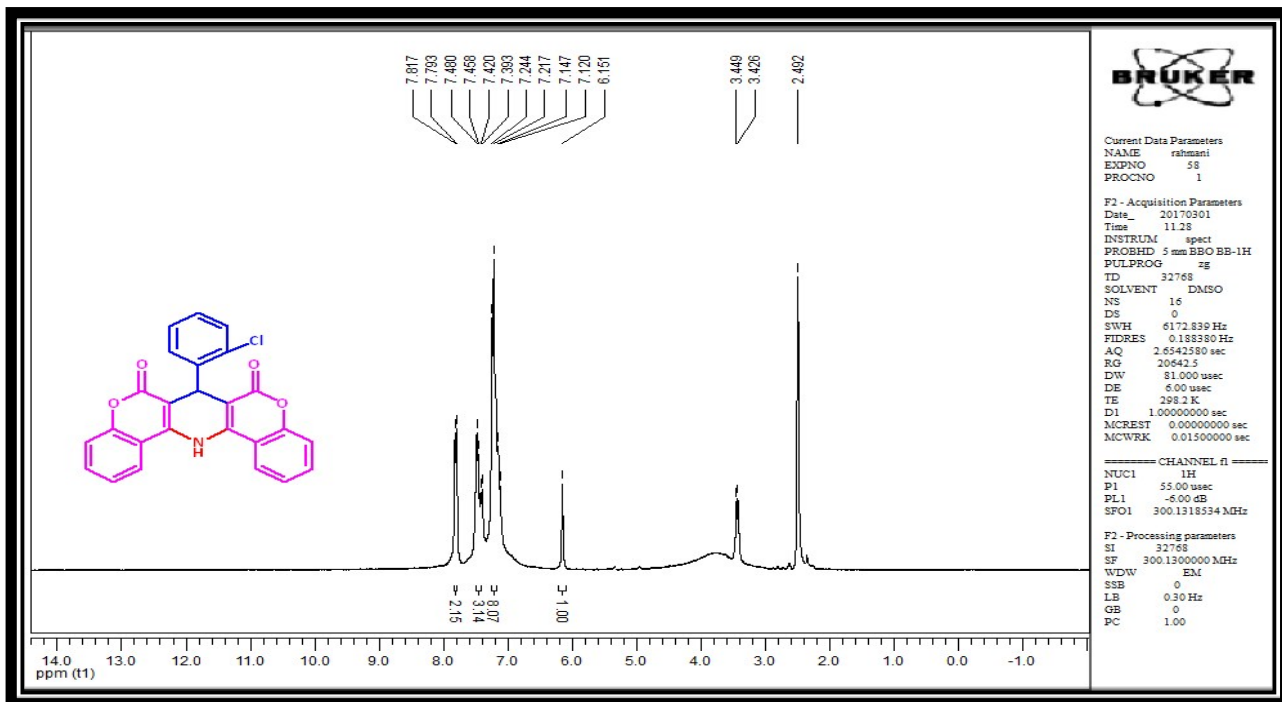

<sup>13</sup>C NMR (75 MHz, DMSO-d<sub>6</sub>) of 7-(2-chlorophenyl)-7,14-dihydro-6H,8H-dichromeno[4,3-b:3',4'-e]pyridine-6,8-dione (4b)

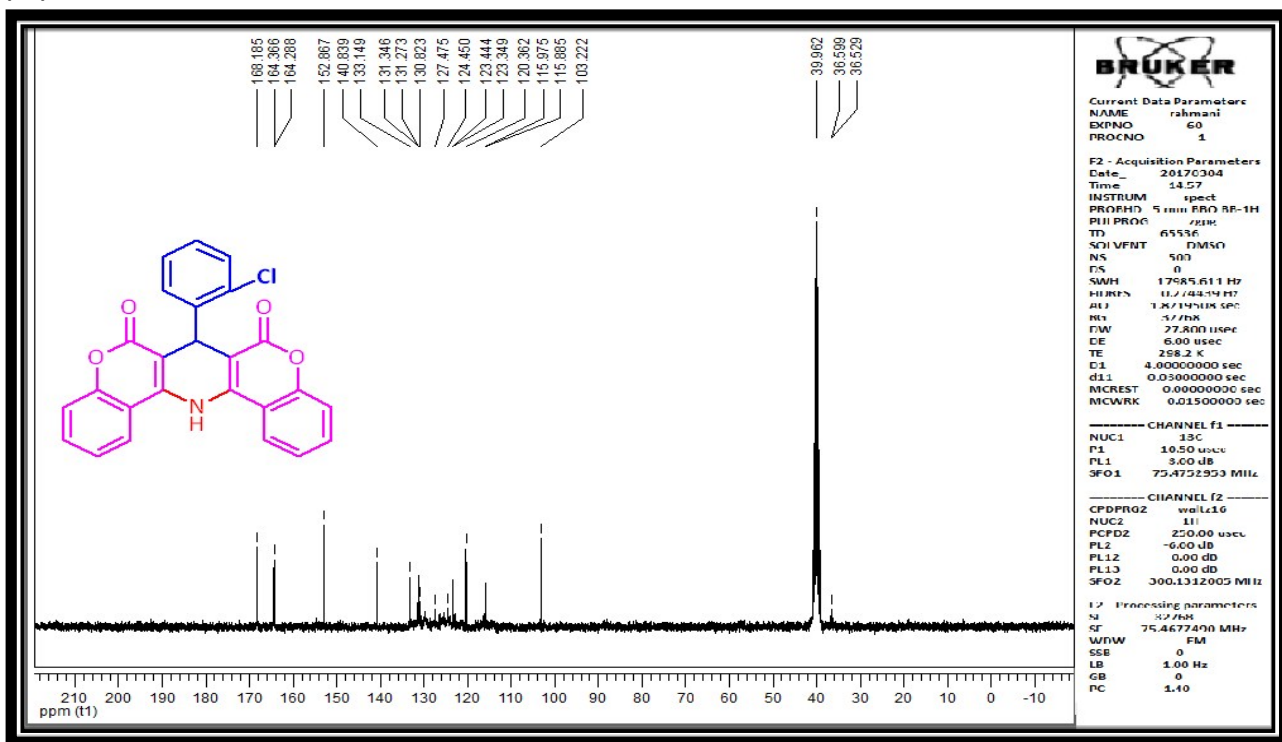



<sup>1</sup>H NMR (300 MHz, DMSO-d<sub>6</sub>) of 7-(4-chlorophenyl)-7,14-dihydro-6H,8H-dichromeno[4,3-b:3',4'-e]pyridine-6,8-dione (4c) (Deuterium exchanged)

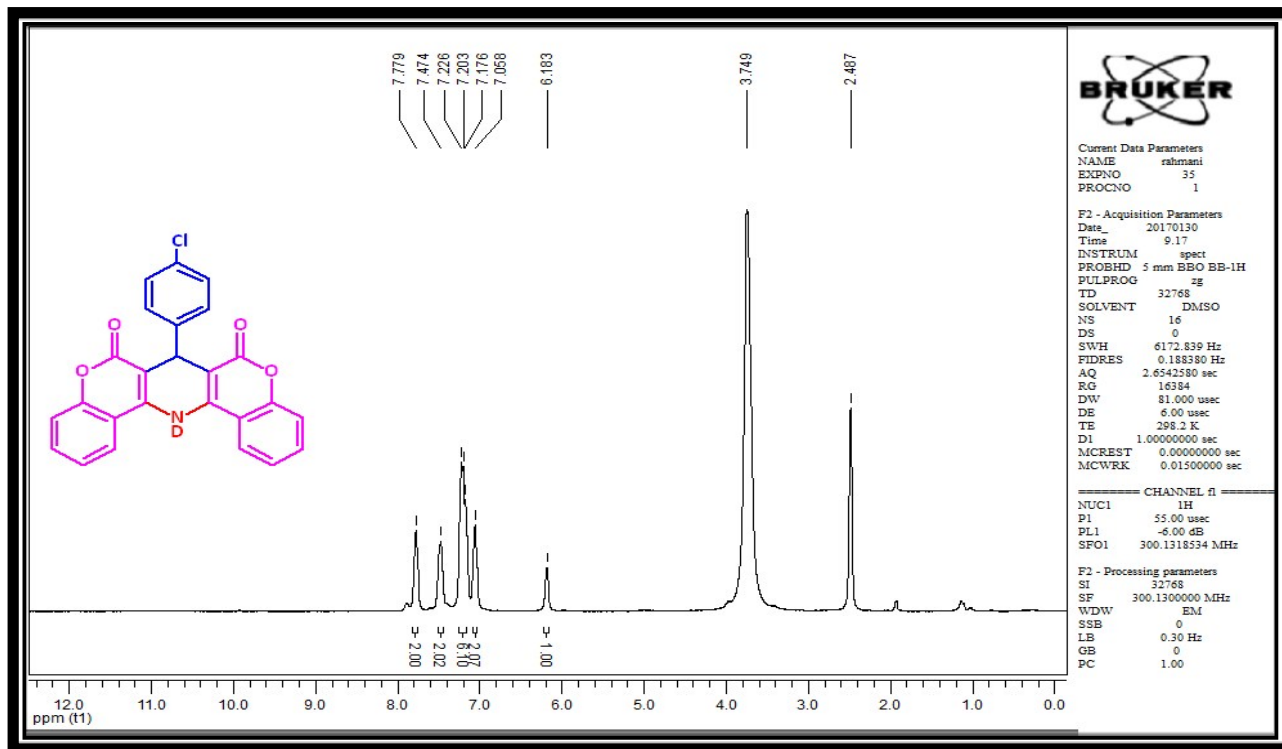

<sup>13</sup>C NMR (75 MHz, DMSO-d<sub>6</sub>) of 7-(4-chlorophenyl)-7,14-dihydro-6H,8H-dichromeno[4,3-b:3',4'-e]pyridine-6,8-dione (4c)

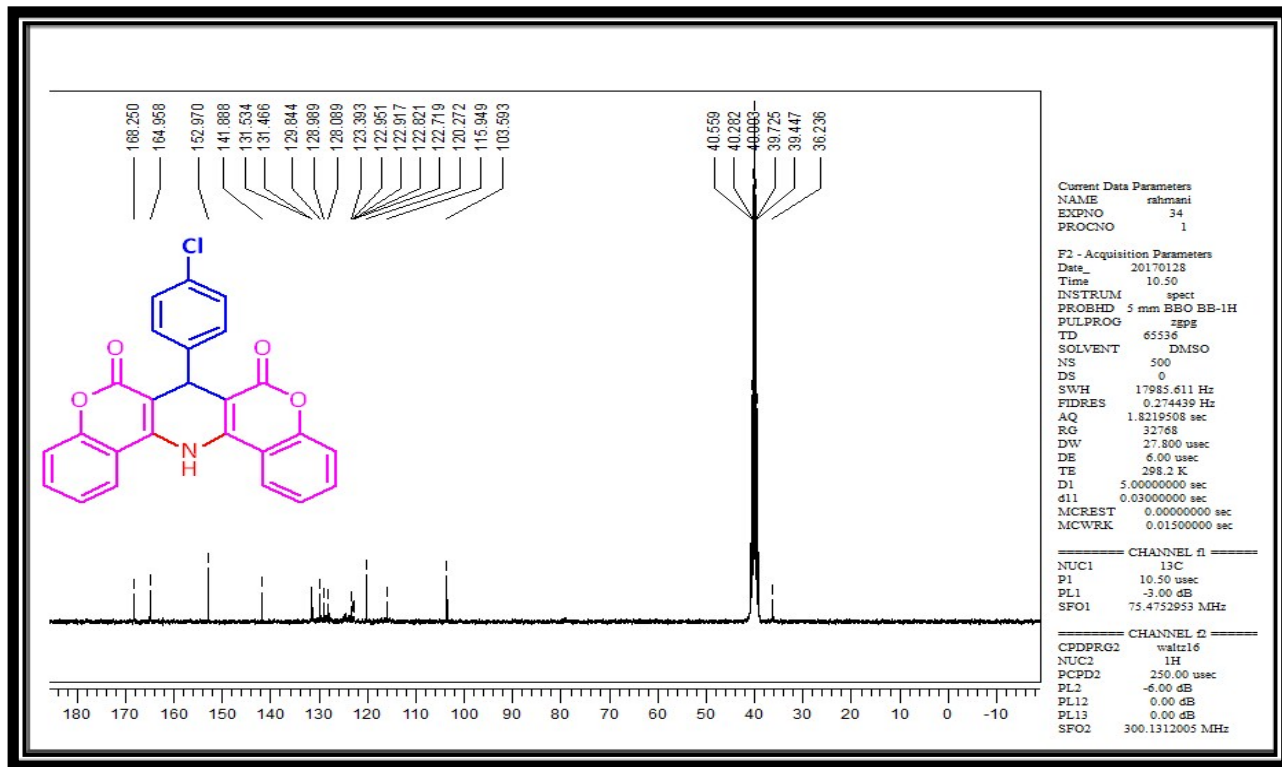

FT-IR (KBr) of 7-(4-chlorophenyl)-7,14-dihydro-6H,8H-dichromeno[4,3-b:3',4'-e]pyridine-6,8-dione (4c)

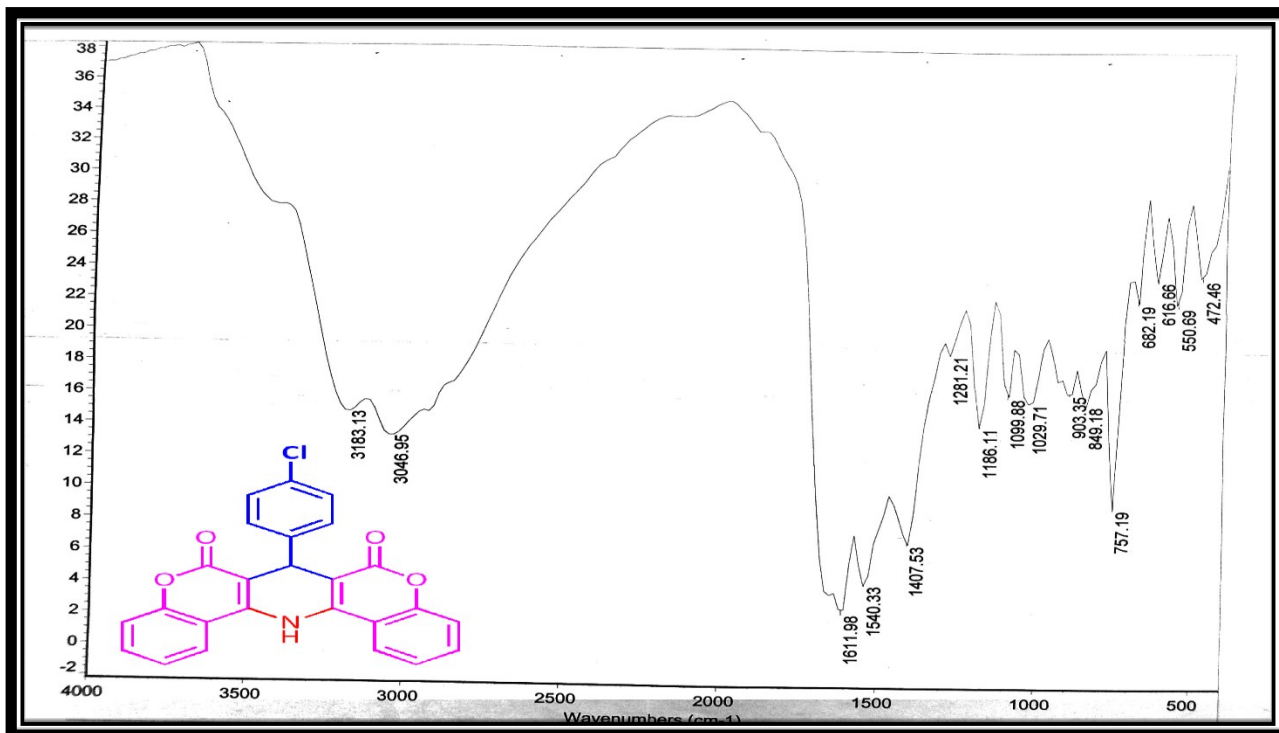

<sup>1</sup>H NMR (300 MHz, DMSO-d<sub>6</sub>) of 7-(3-hydroxy-4-methoxyphenyl)-7,14-dihydro-6H,8H-dichromeno[4,3-b:3',4'-e]pyridine-6,8-dione (4d)

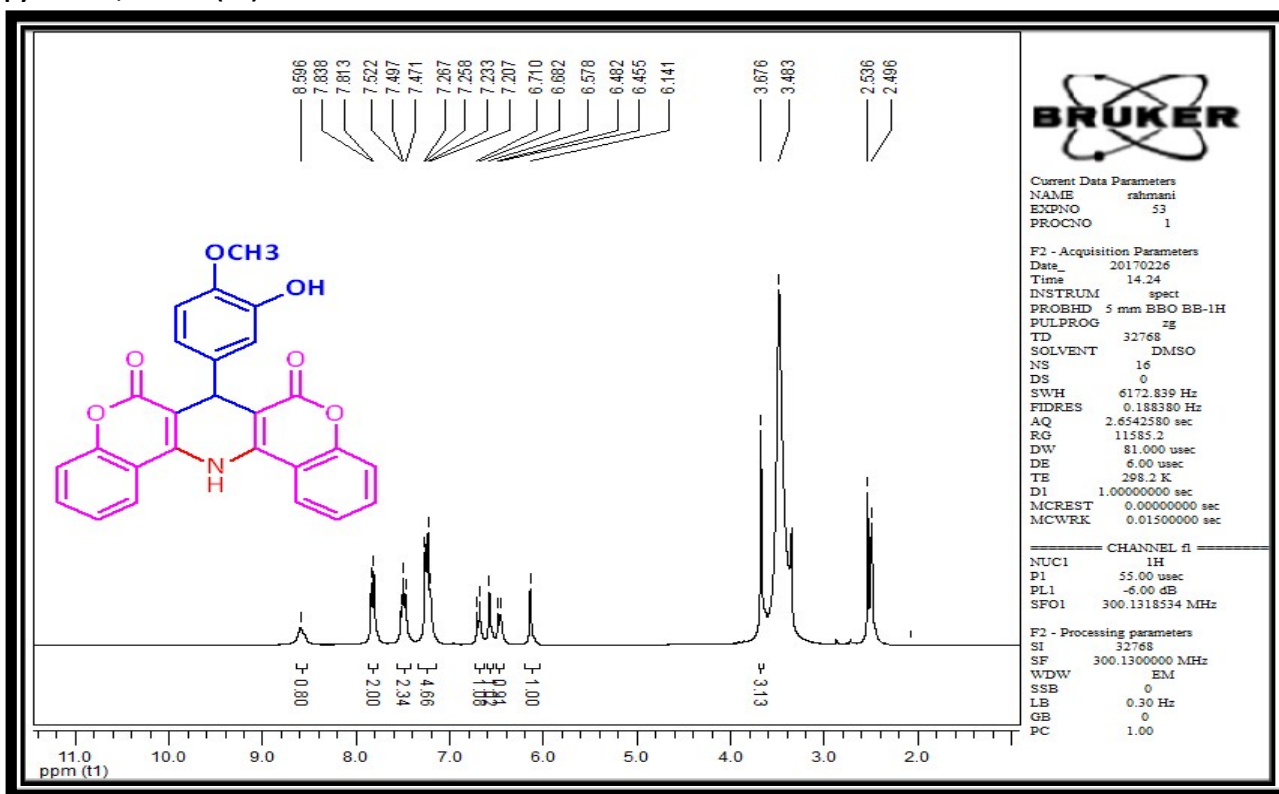

<sup>13</sup>C NMR (75 MHz, DMSO-d<sub>6</sub>) of 7-(3-hydroxy-4-methoxyphenyl)-7,14-dihydro-6H,8H-dichromeno[4,3-b:3',4'-e] pyridine-6,8-dione (4d)

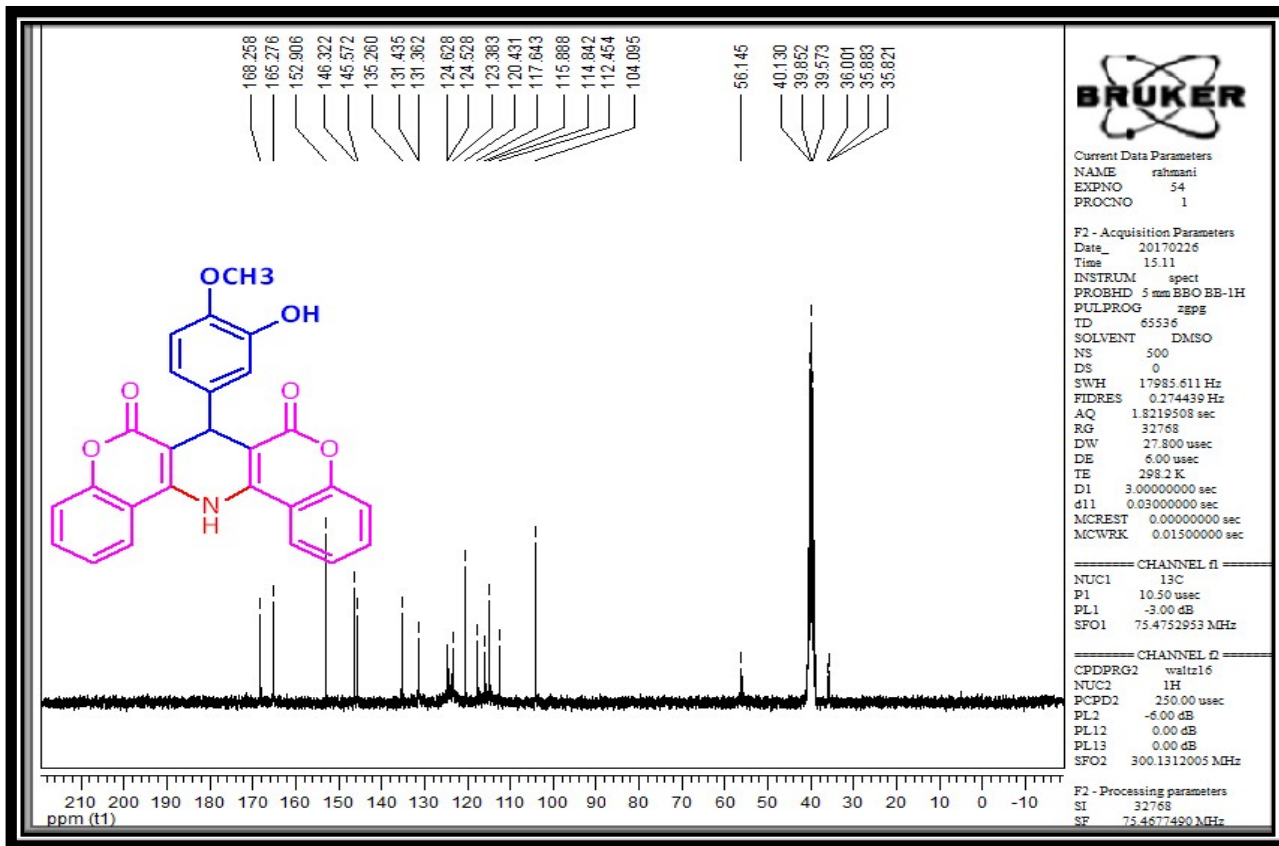

FT-IR (KBr) of 7-(3-hydroxy-4-methoxyphenyl)-7,14-dihydro-6H,8H-dichromeno[4,3-b:3',4'-e] pyridine-6,8-dione (4d)

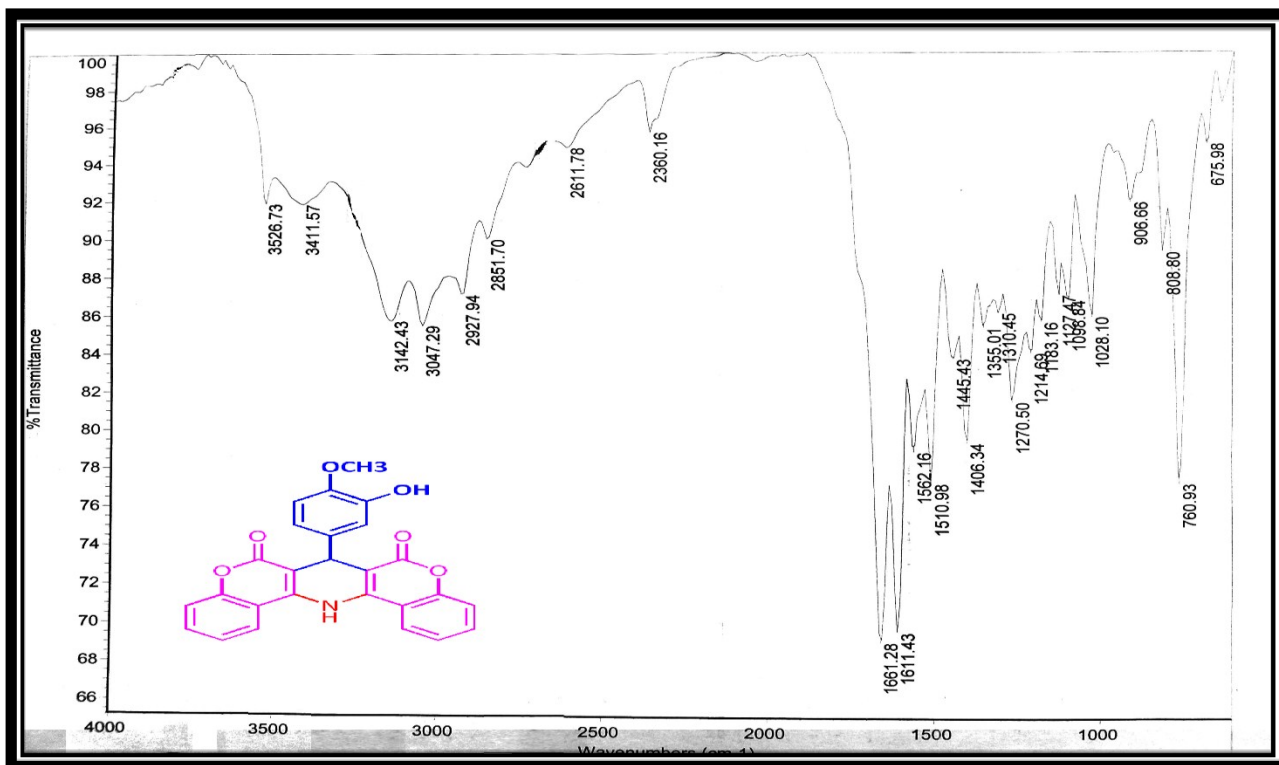

<sup>1</sup>H NMR (300 MHz, DMSO-d<sub>6</sub>) of (4-hydroxy-3-methoxyphenyl)-7,14-dihydro-6H,8H-dichromeno[4,3-b:3',4'-e]pyridine-6,8-dione (4e)

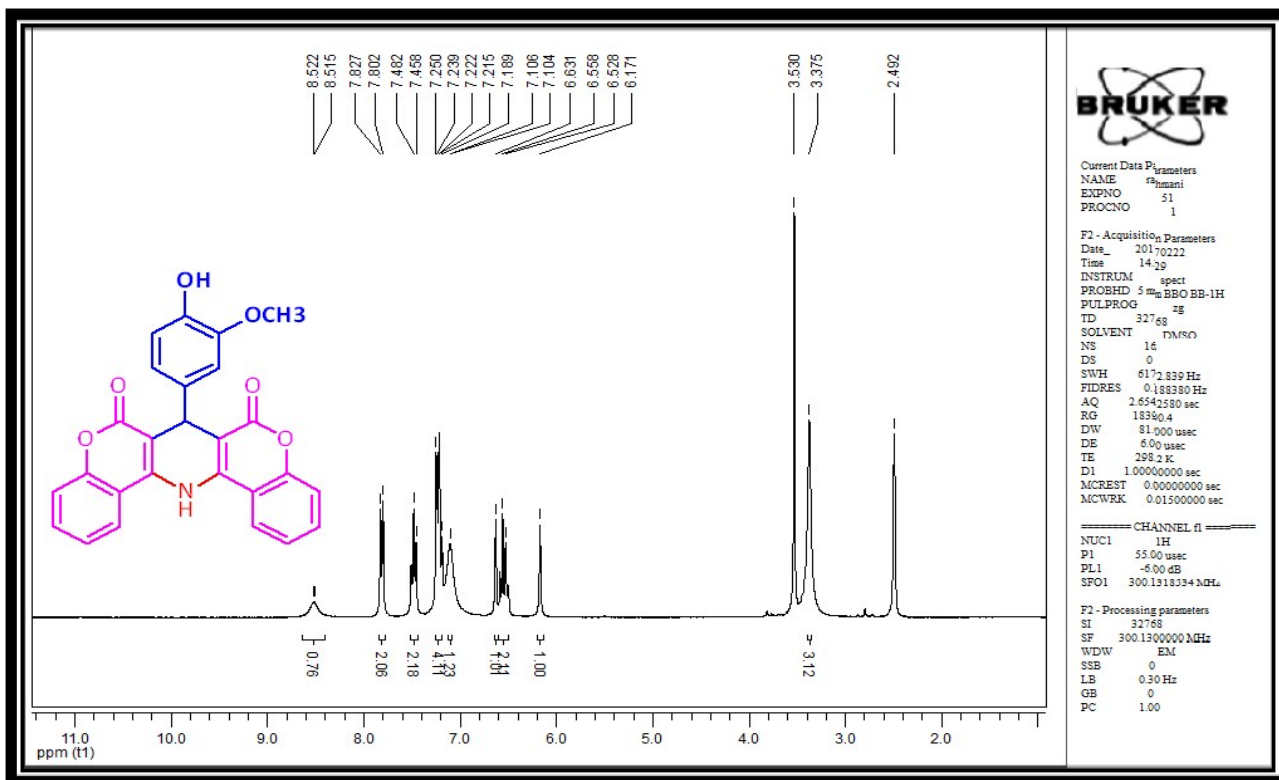

<sup>13</sup>C NMR (75 MHz, DMSO-d<sub>6</sub>) of (4-hydroxy-3-methoxyphenyl)-7,14-dihydro-6H,8H-dichromeno[4,3-b:3',4'-e]pyridine-6,8-dione (4e)

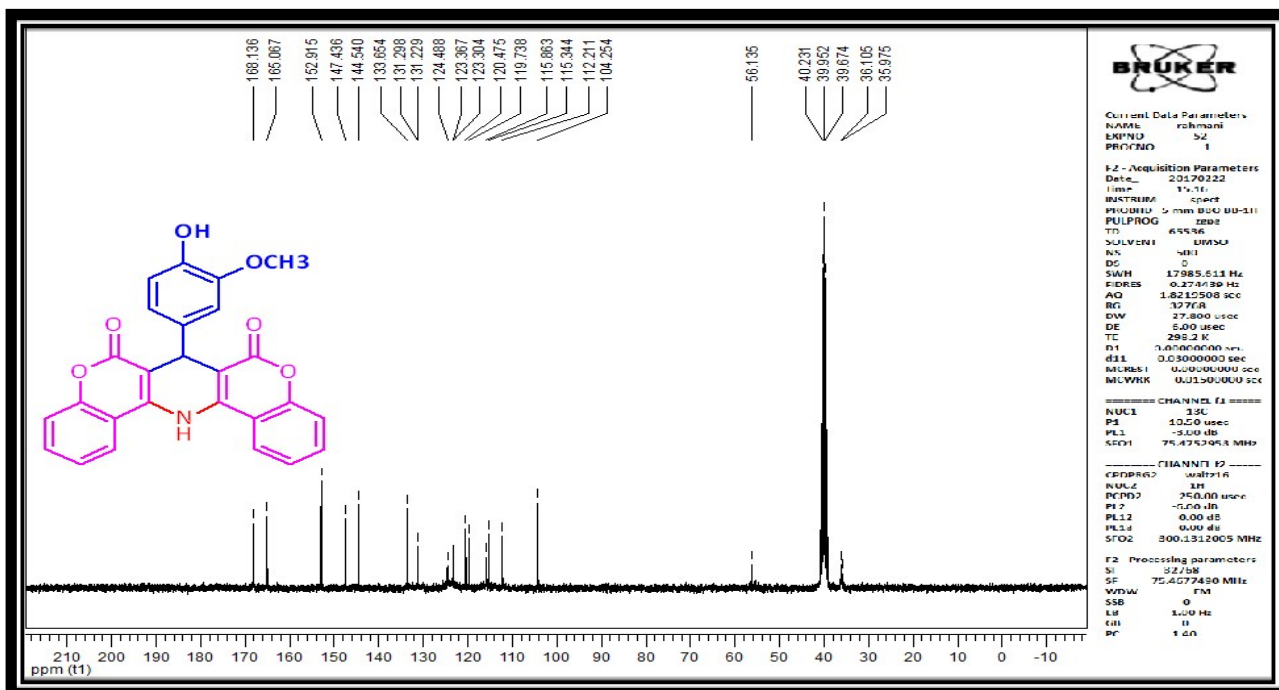

FT-IR (KBr) of 7-(4-hydroxy-3-methoxyphenyl)-7,14-dihydro-6H,8H-dichromeno[4,3-b:3',4'-e]pyridine-6,8-dione (4e)

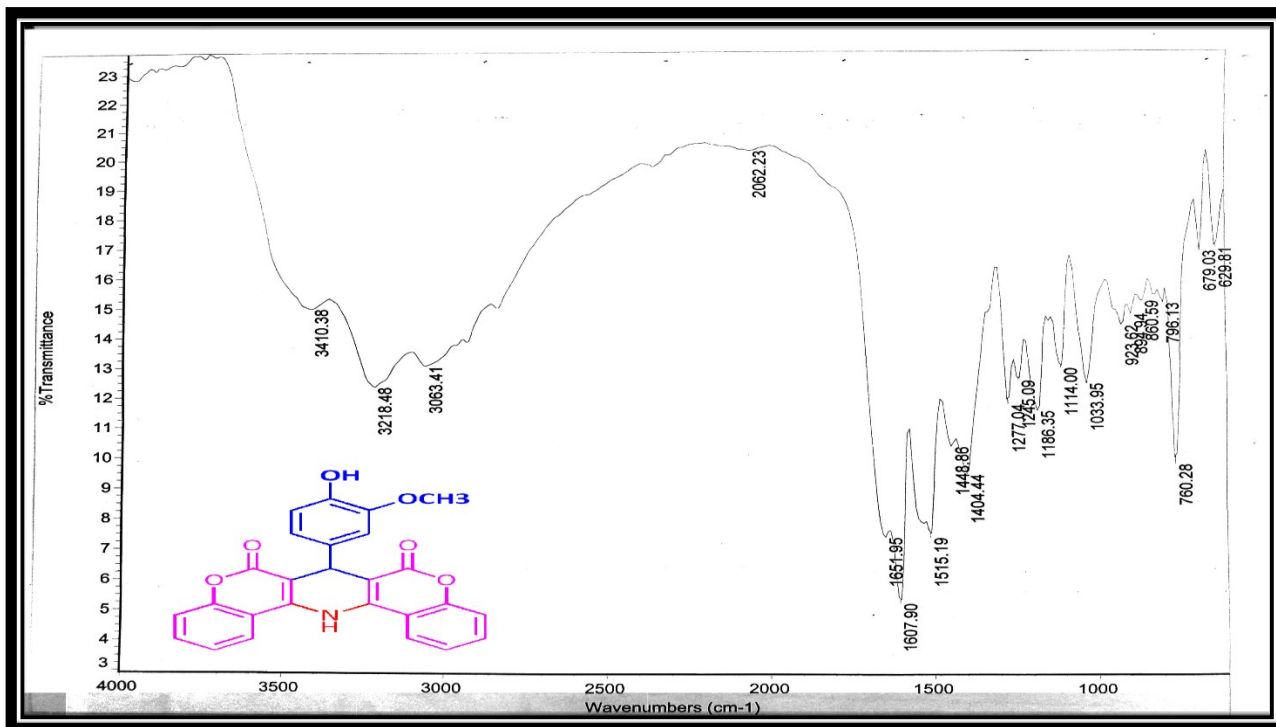

<sup>1</sup>H NMR (300 MHz, DMSO-d<sub>6</sub>) of 7-(3-methoxyphenyl)-7,14-dihydro-6H,8H-dichromeno[4,3-b:3',4'-e]pyridine-6,8-dione (4f)

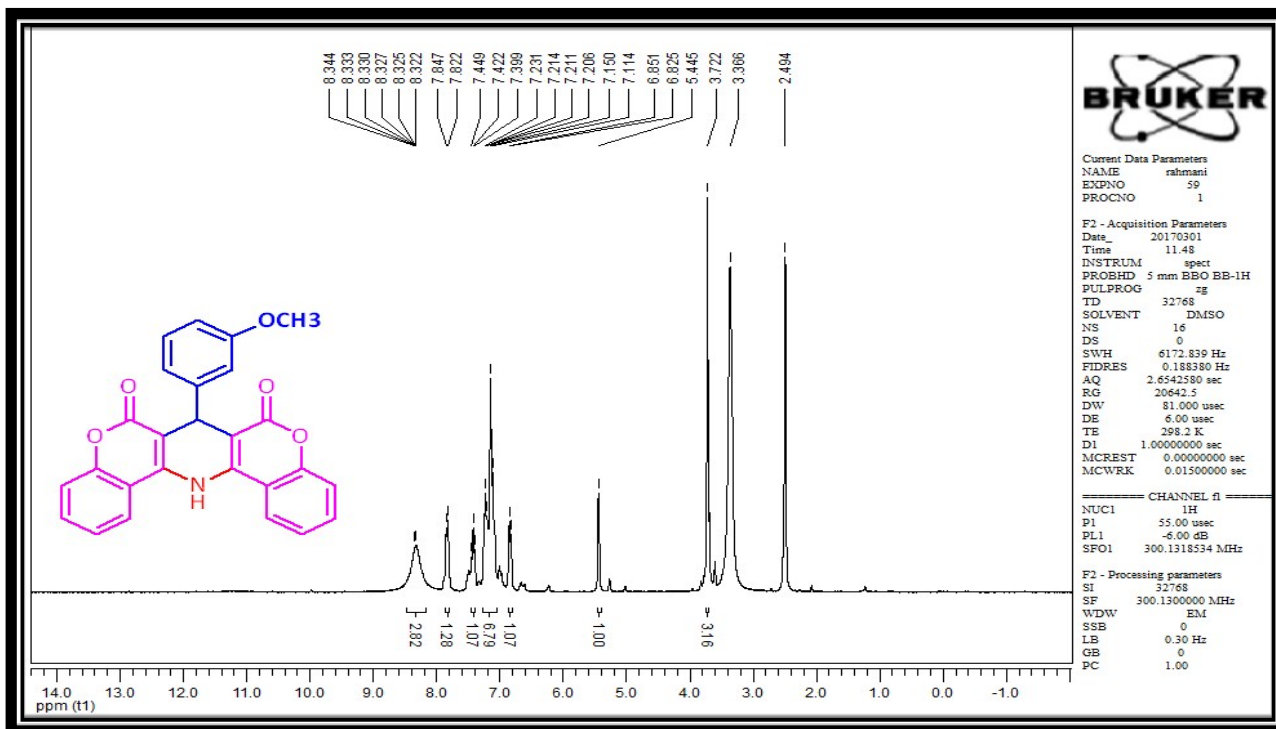



**<sup>13</sup>C NMR (75 MHz, DMSO-d<sub>6</sub>) of 7-(3-methoxyphenyl)-7,14-dihydro-6H,8H-dichromeno[4,3-b:3',4'-e]pyridine-6,8-dione (4f)**

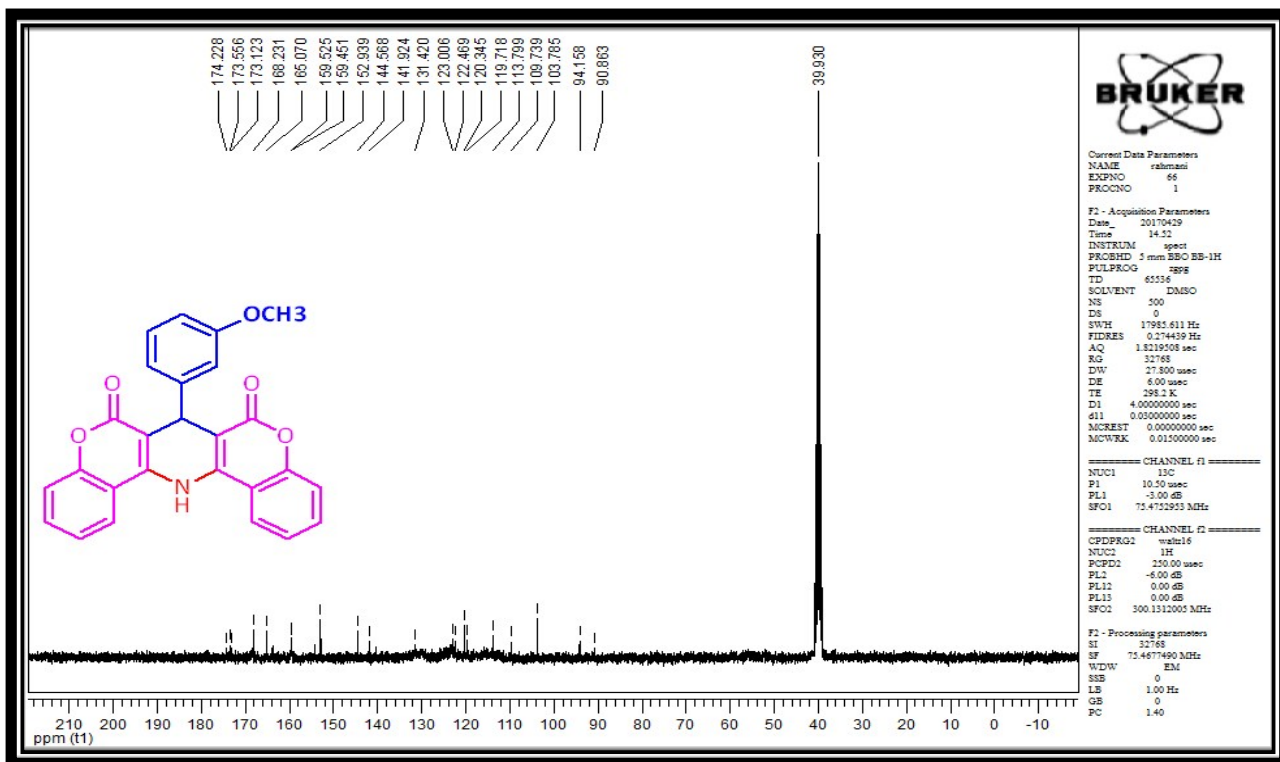

**FT-IR (KBr) of 7-(3-methoxyphenyl)-7,14-dihydro-6H,8H-dichromeno[4,3-b:3',4'-e]pyridine-6,8-dione (4f)**

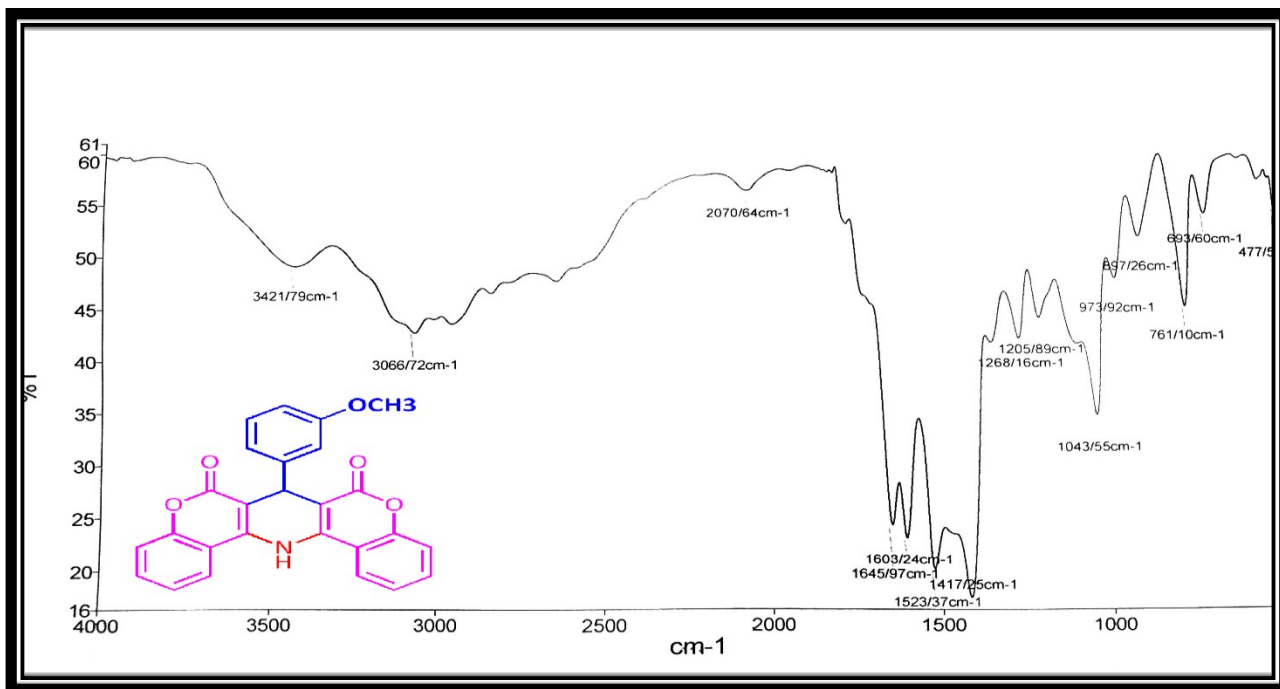

<sup>1</sup>H NMR (300 MHz, DMSO-d<sub>6</sub>) of 7-(*p*-tolyl)-7,14-dihydro-6H,8H-dichromeno[4,3-*b*:3',4'-*e*]pyridine-6,8-dione (4h)

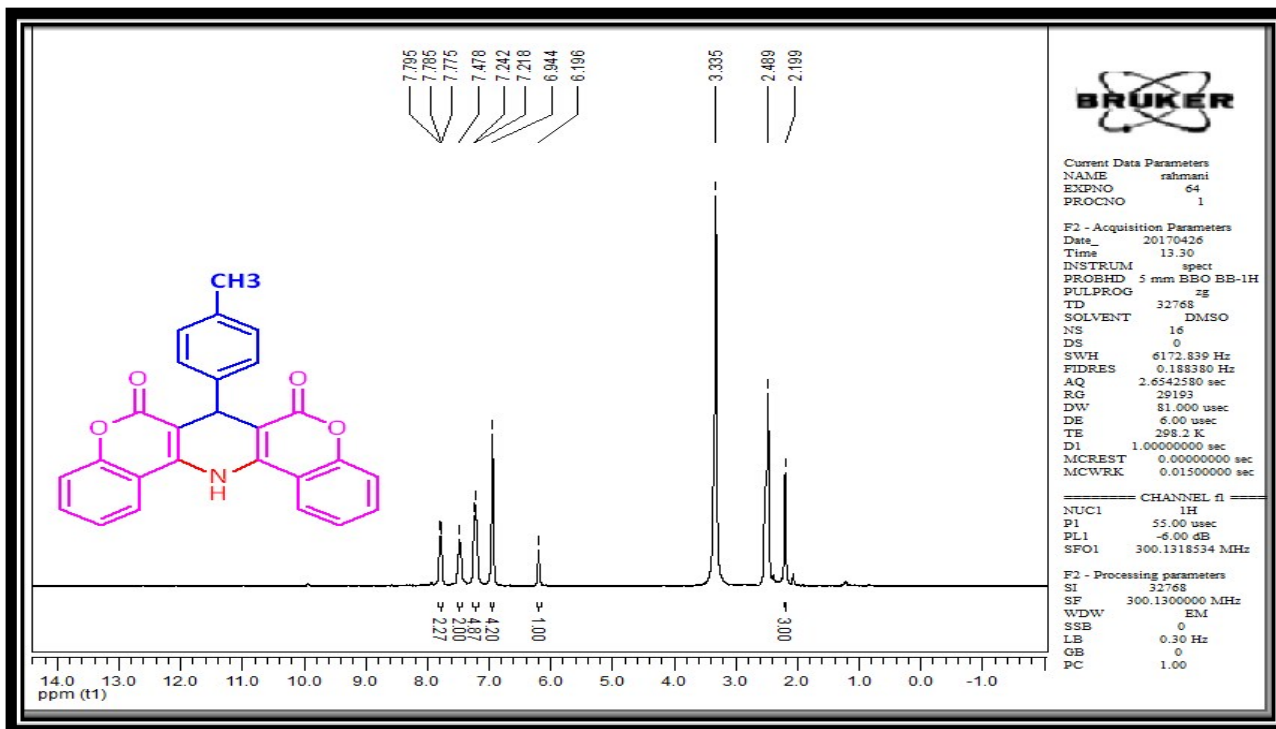

<sup>13</sup>C NMR (75 MHz, DMSO-d<sub>6</sub>) of 7-(*p*-tolyl)-7,14-dihydro-6H,8H-dichromeno[4,3-*b*:3',4'-*e*]pyridine-6,8-dione (4h)

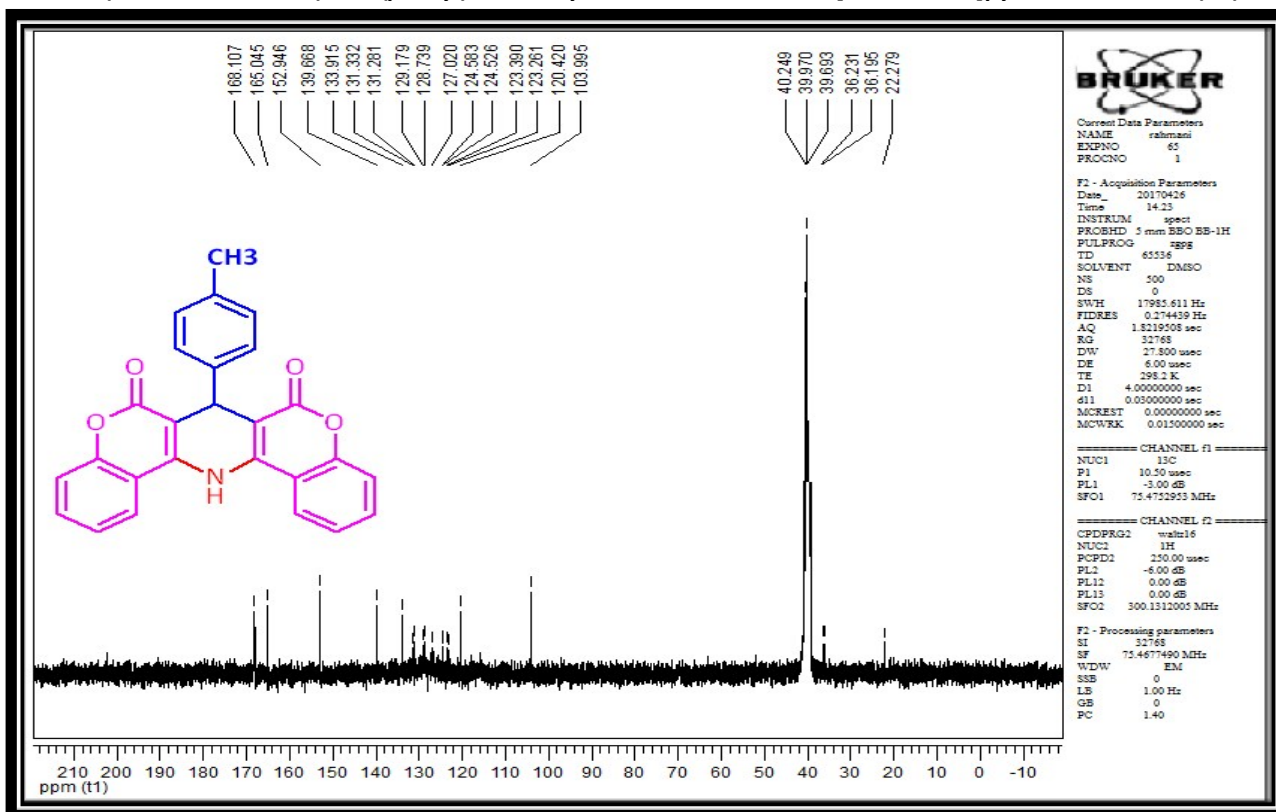

FT-IR (KBr) of 7-(*p*-tolyl)-7,14-dihydro-6H,8H-dichromeno[4,3-b:3',4'-e]pyridine-6,8-dione (4h)

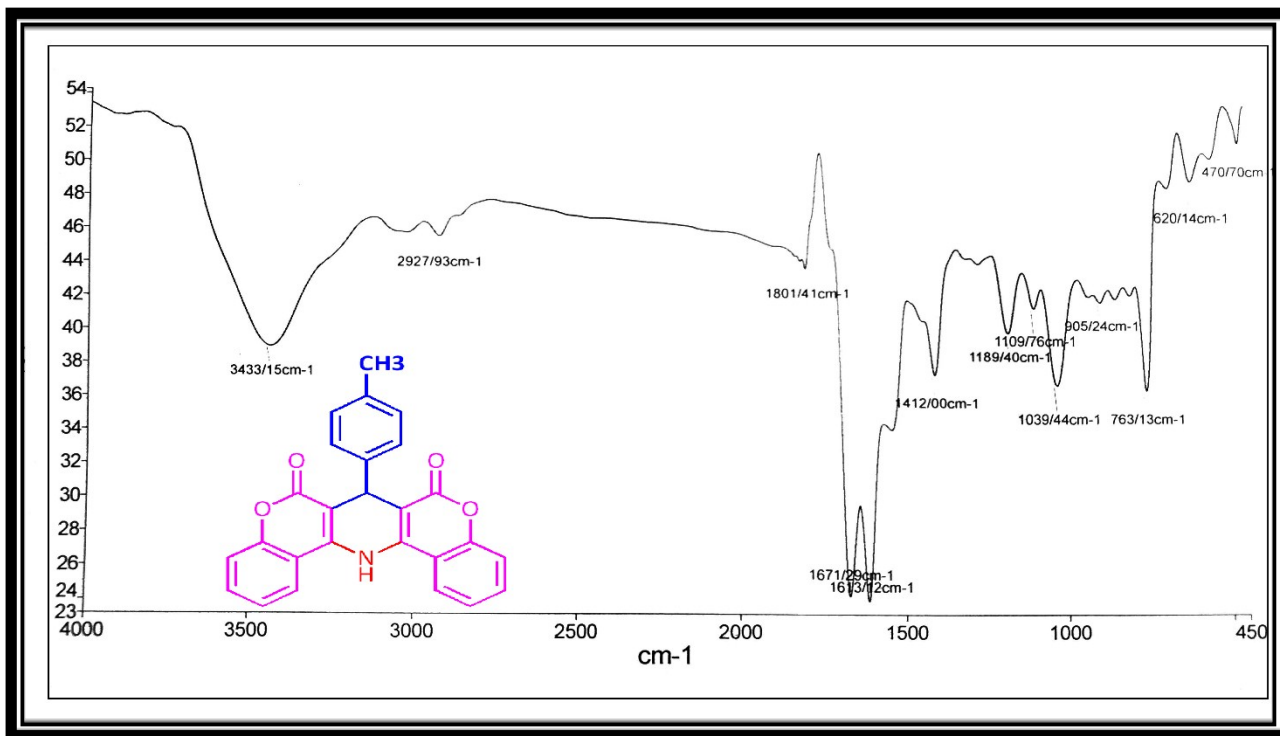

<sup>1</sup>H NMR (300 MHz, DMSO-d<sub>6</sub>) of 7-(4-nitrophenyl)-7,14-dihydro-6H,8H-dichromeno[4,3-b:3',4'-e]pyridine-6,8-dione (4j)

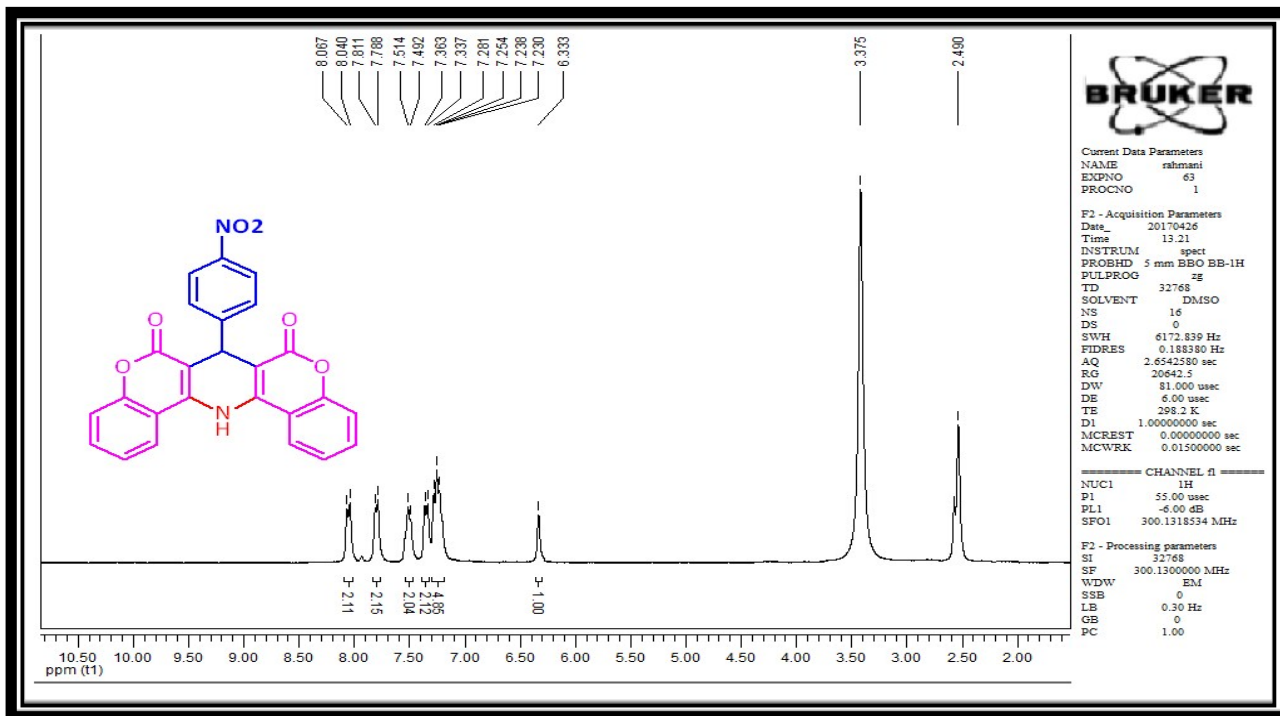

<sup>13</sup>C NMR (75 MHz, DMSO-d<sub>6</sub>) of 7-(4-nitrophenyl)-7,14-dihydro-6H,8H-dichromeno[4,3-b:3',4'-e]pyridine-6,8-dione (4j)

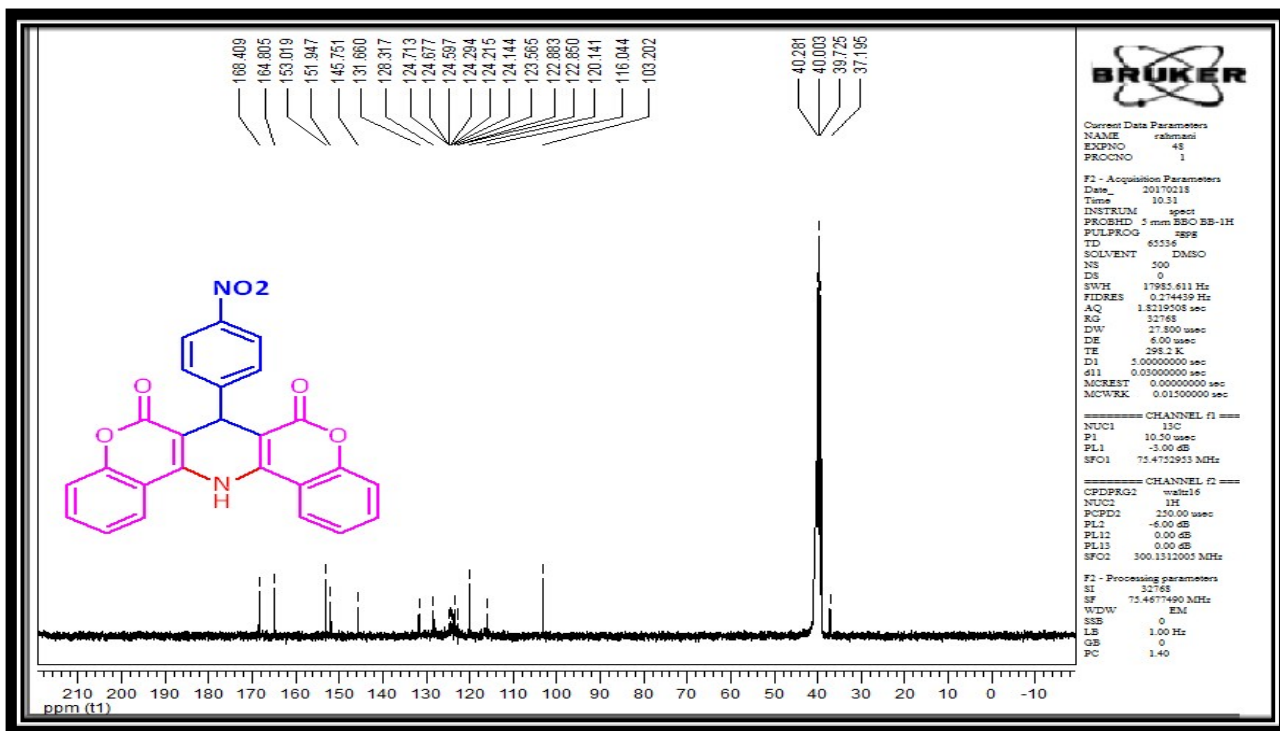

FT-IR (KBr) of 7-(4-nitrophenyl)-7,14-dihydro-6H,8H-dichromeno[4,3-b:3',4'-e]pyridine-6,8-dione (4j)

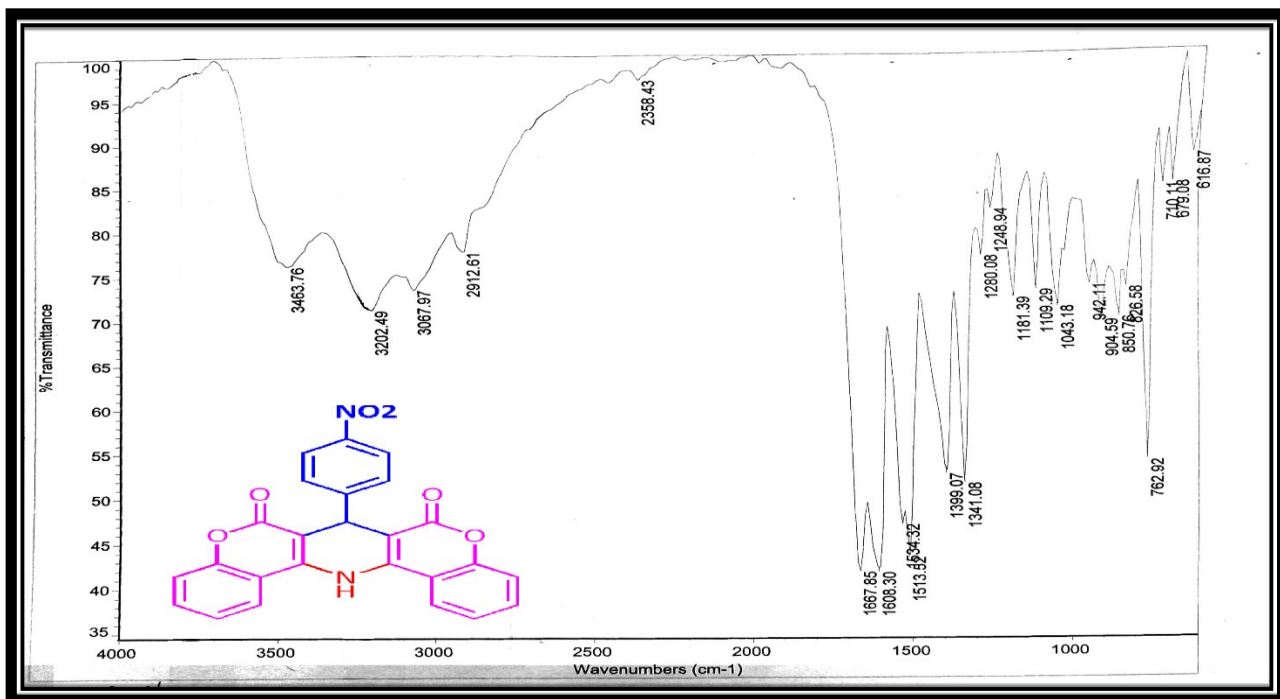



FT-IR (KBr) of 7-(4-chloro-3-nitrophenyl)-7,14-dihydro-6H,8H-dichromeno[4,3-b:3',4'-e]pyridine-6,8-dione (4I)

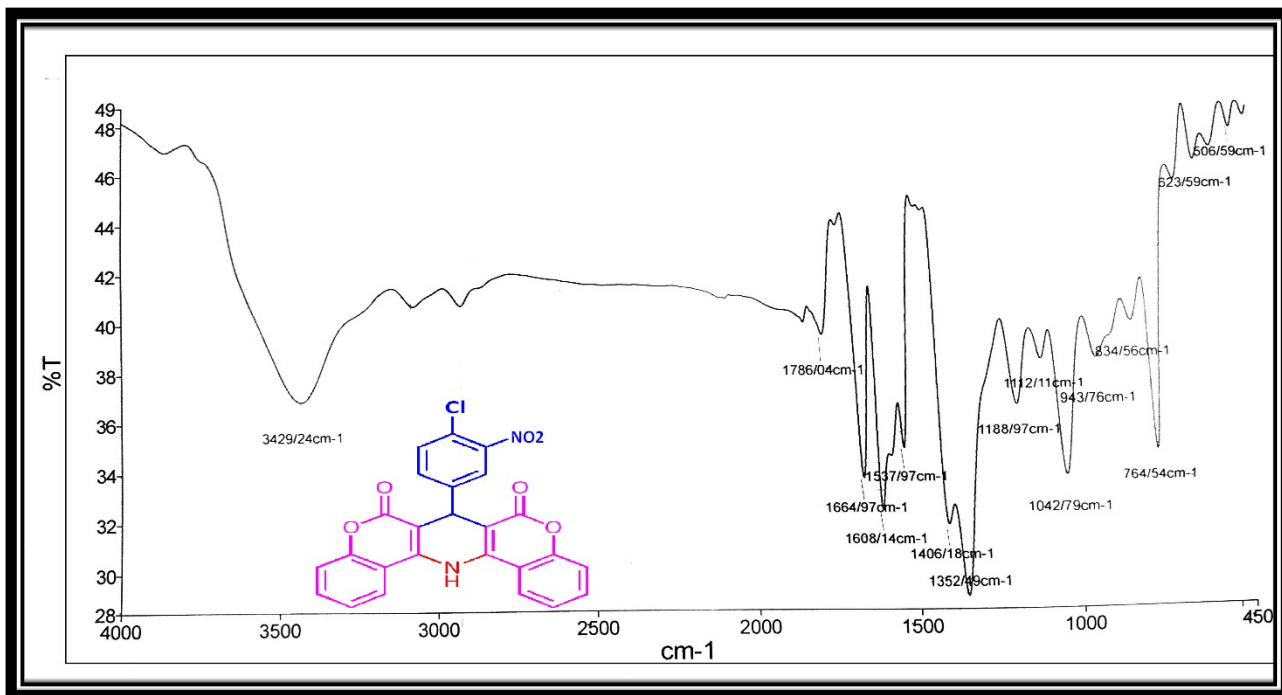

Supplement: c9ra00177h1.pdf [file c9ra00177h1.pdf]
